# Supplementary figures and images for: In VitroCulture Conditions for Maintaining a Complex Population of Human Gastrointestinal Tract Microbiota
Source: Hindawi journal article supplement (doi:10.1155/2011/838040), 2011-01-01

Supplementary figure S4.

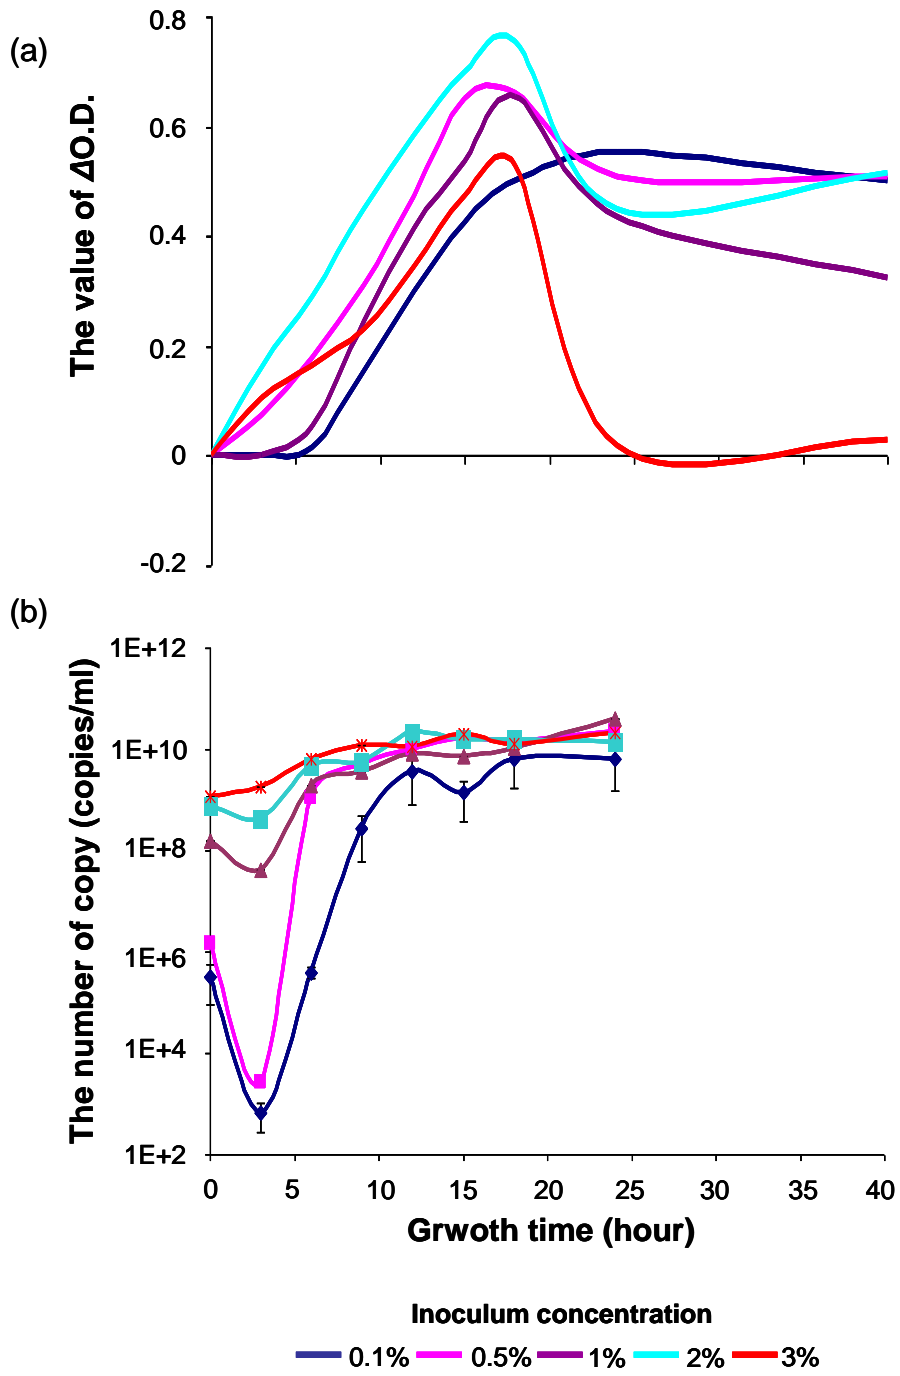

Supplement: f4 [file 838040.f4.pdf]

Supplemenatry figure S5.

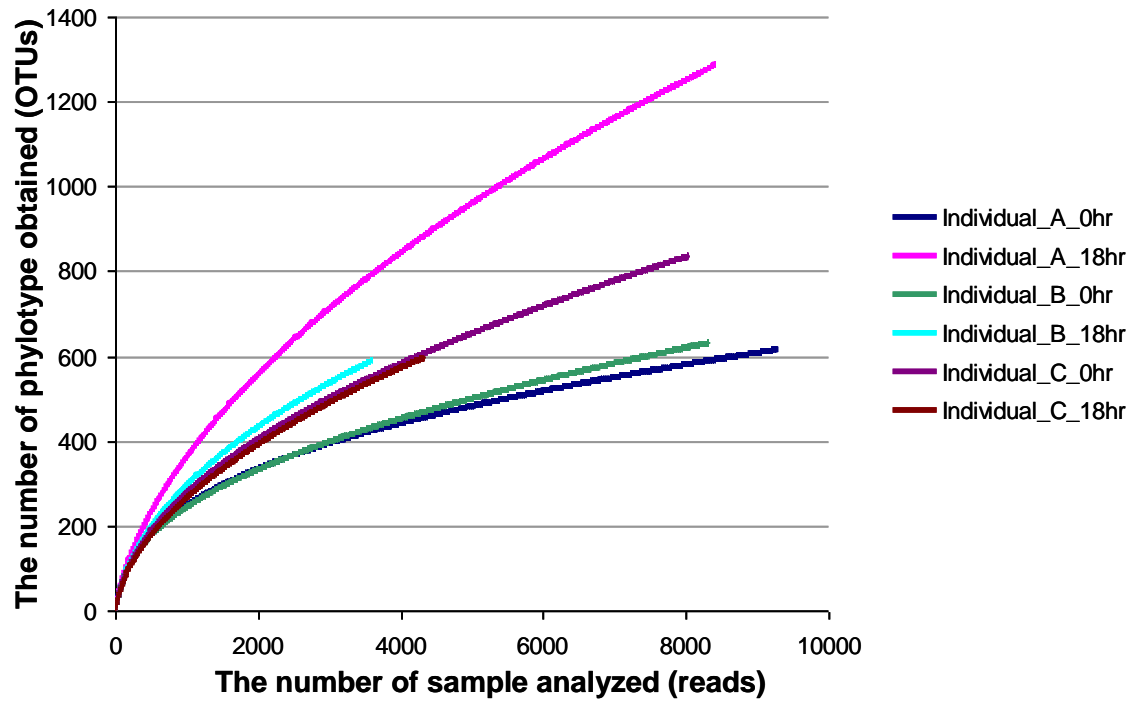

Supplement: f5 [file 838040.f5.pdf]

Supplementary figure S2.

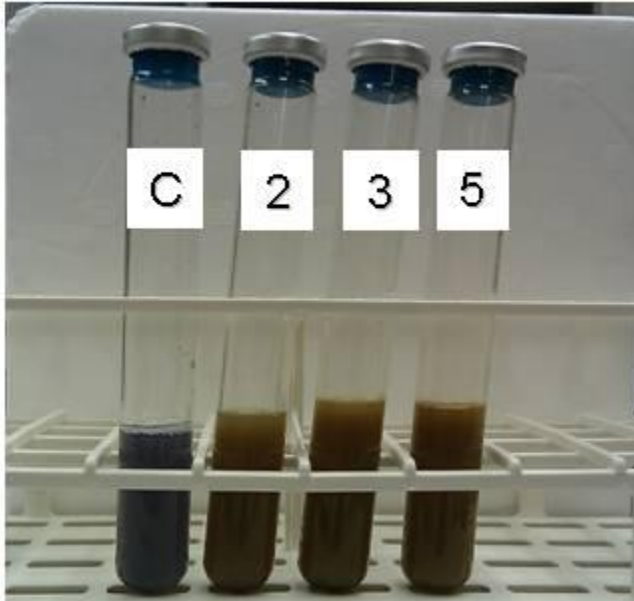

Supplement: f2 [file 838040.f2.pdf]

Supplementary figure S3.

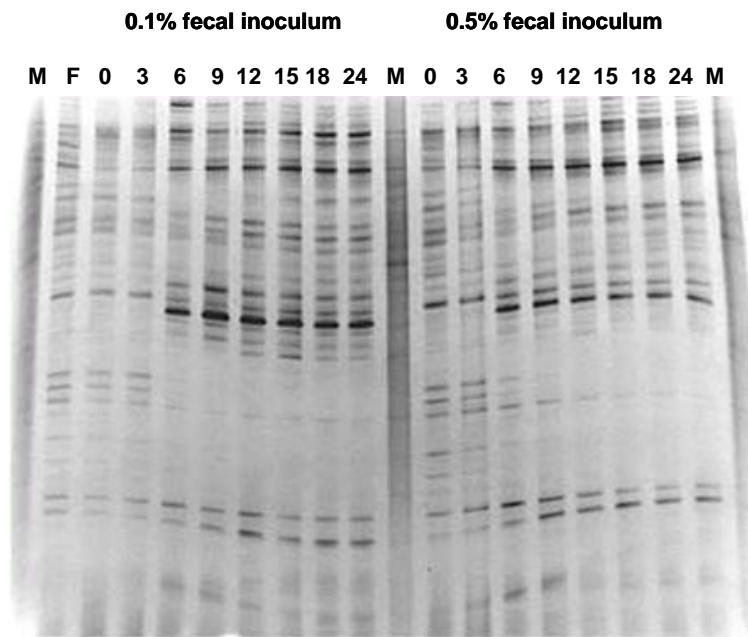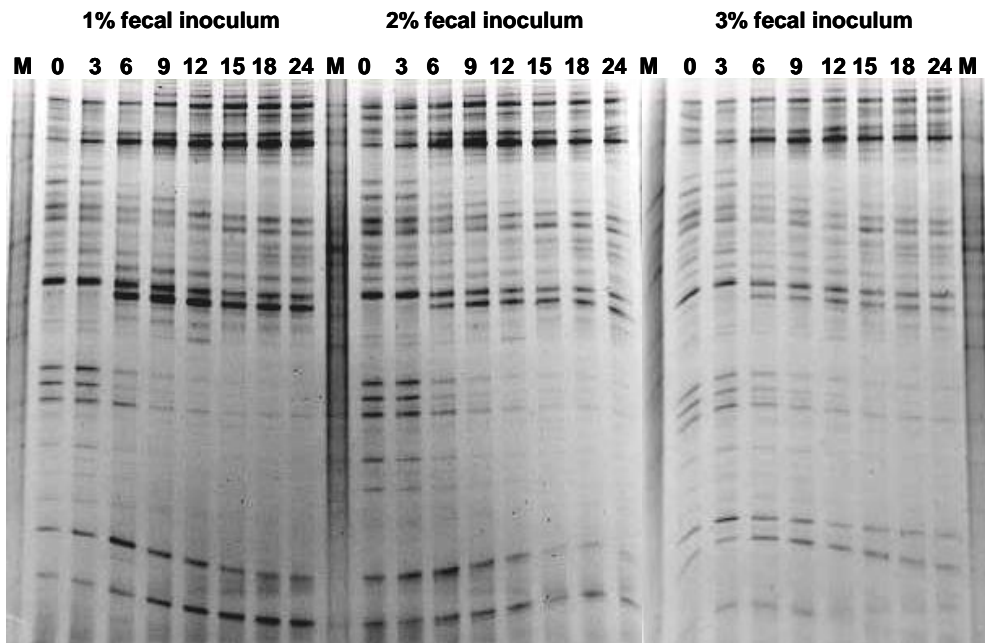

Supplement: f3 [file 838040.f3.pdf]
